# Supplementary material for: Mesoporous K-doped NiCo2O4 derived from a Prussian blue analog: high-yielding synthesis and assessment as oxygen evolution reaction catalyst
Source: Royal Society of Chemistry journal article supplement (doi:10.1039/d2ra01235a), 2022-01-01
Supplement: d2ra01235a1.pdf [file d2ra01235a1.pdf]

*Supporting Information*

**Mesoporous K-doped NiCo<sub>2</sub>O<sub>4</sub> derived from Prussian blue analog: High-yielding synthesis and assessment as oxygen evolution reaction catalyst**

Nam Woon Kim,<sup>a</sup> Hyunung Yu<sup>b\*</sup> and Jihun Oh<sup>c,d\*</sup>

<sup>a</sup>*Department of Nature-Inspired Nano Convergence Systems, Korea Institute of Machinery and Materials (KIMM), Daejeon 34103, Republic of Korea*

<sup>b</sup>*Surface Analysis Team, Korea Research Institute of Standards and Science (KRISS), Daejeon 34113, Republic of Korea*

<sup>c</sup>*Department of Materials Science and Engineering, Korea Advanced Institute of Science and Technology (KAIST), Daejeon 34141, Republic of Korea*

<sup>d</sup>*KAIST Institute for NanoCentury, Korea Advanced Institute of Science and Technology (KAIST), Daejeon 34141, Republic of Korea*

**\*Corresponding authors.** Emails: [peacewithu@kriss.re.kr](mailto:peacewithu@kriss.re.kr) (H. Y.), [jihun.oh@kaist.ac.kr](mailto:jihun.oh@kaist.ac.kr) (J. O.)

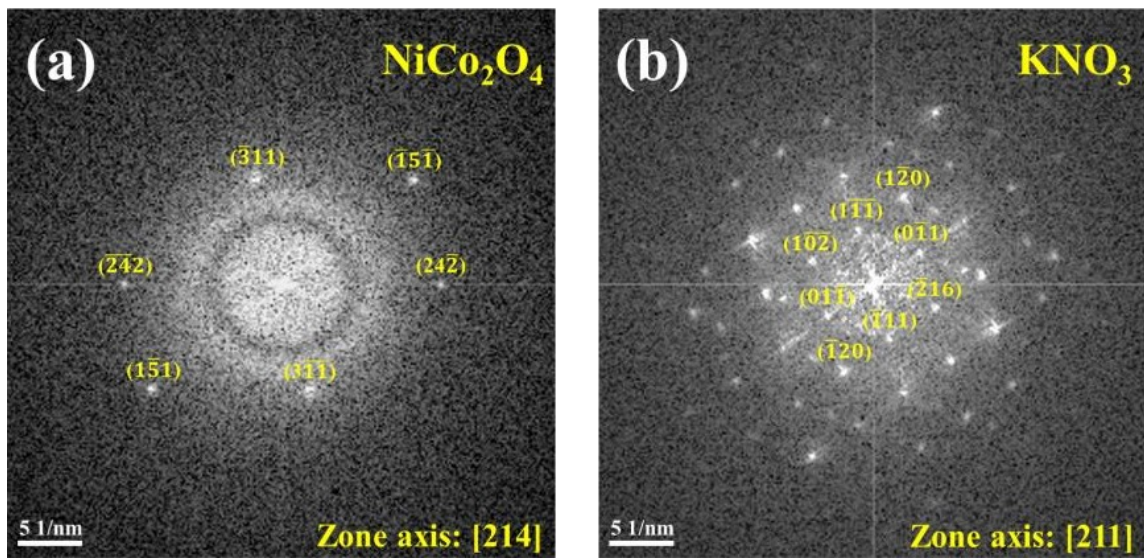

**Figure S1.** Fast Fourier transform patterns of (a)  $\text{NiCo}_2\text{O}_4$  (white rectangle in Fig. 1b) and (b)  $\text{KNO}_3$  (red rectangle in Fig. 1b).

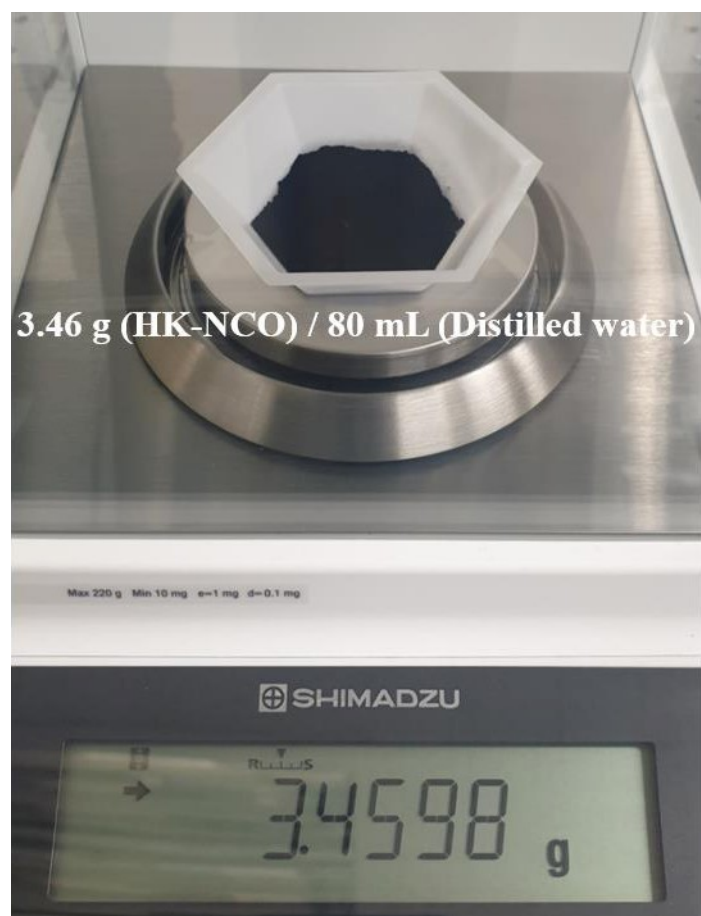

**Figure S2.** Weighing the HK-NCO catalyst powder produced by hydrothermal synthesis.

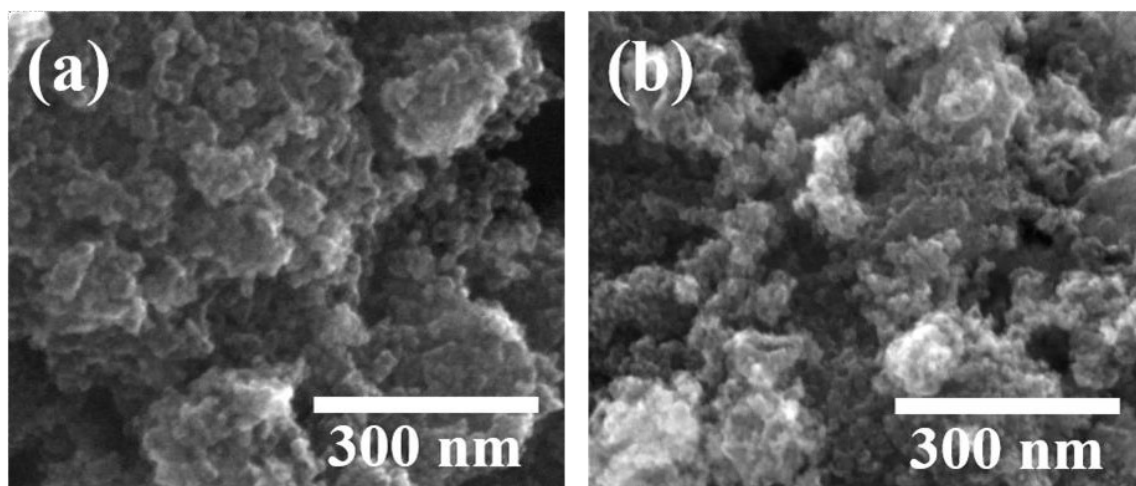

**Figure S3.** SEM images of catalysts prepared (a) hydrothermally ( $\text{KNO}_3$  + high-concentration K-doped  $\text{NiCo}_2\text{O}_4$ ) and (b) non-hydrothermally ( $\text{KNO}_3$  + low-concentration K-doped  $\text{NiCo}_2\text{O}_4$ ).

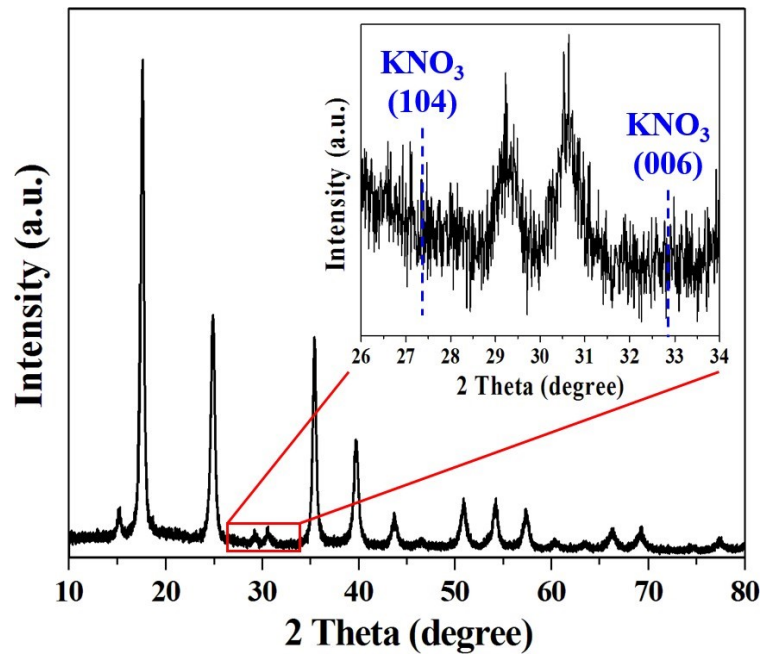

**Figure S4.** XRD pattern of hydrothermally synthesized K-Ni-Co-PBA. Inset shows an expansion of the region of interest, confirming the absence of crystalline KNO<sub>3</sub>.

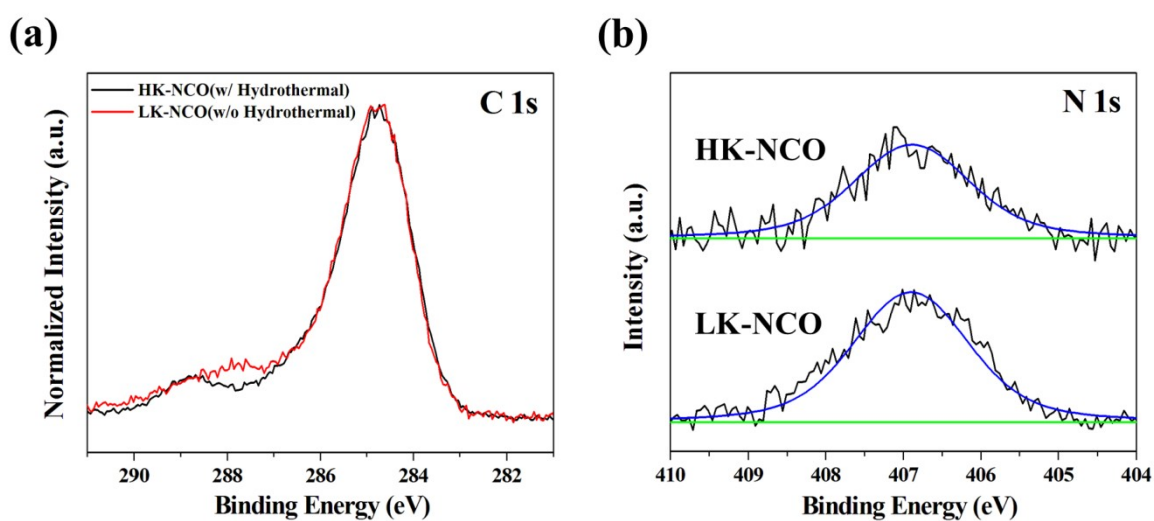

$$(c) \frac{N_{(area)}}{N_{(ASF)}} = \frac{K_{KNO_3}(area)}{K_{(ASF)}} = \frac{\frac{1}{3}O_{KNO_3}(area)}{O_{(ASF)}}$$

Measured in pure  $KNO_3$

$$N_{(ASF)} = 4.506, K_{(ASF)} = 1.466, O_{(ASF)} = 3.023$$

ASF: Atomic Sensitivity Factor

**Figure S5.** (a) C 1s and (b) N 1s spectra of the synthesized catalysts (calibrated using the C 1s peak of adventitious carbon at 284.4 eV) (c) area calculation of elements derived from  $KNO_3$ .

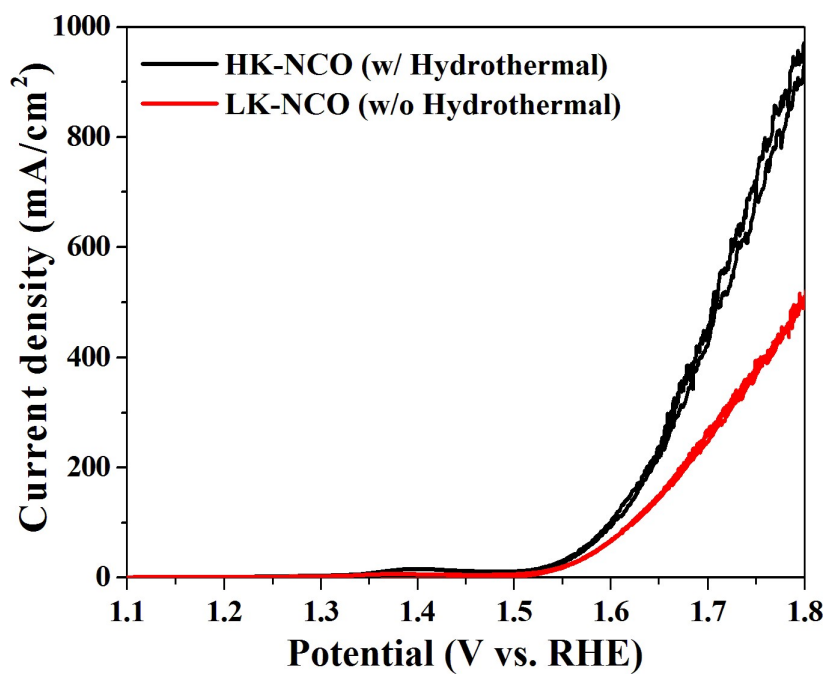

**Figure S6.** CV curves of the prepared catalysts recorded at a scan rate of  $1 \text{ mV s}^{-1}$  to extract overpotentials at  $10 \text{ mA cm}^{-2}$  and Tafel slopes.

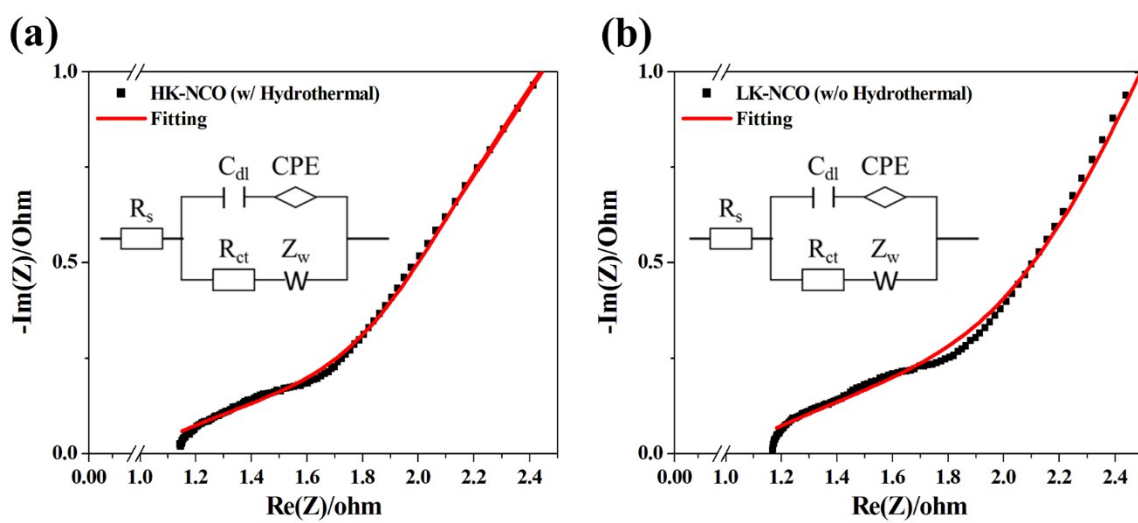

Figure S7. Nyquist plot fitting results for (a) HK-NCO and (b) LK-NCO.



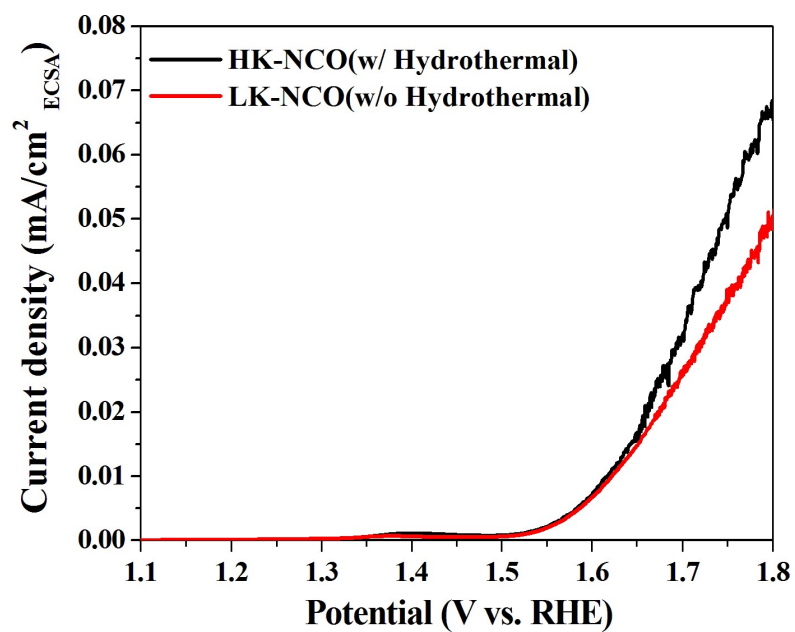

**Figure S8.** ECSA-normalized LSV polarization curves of the prepared catalysts recorded at a scan rate of  $1 \text{ mV s}^{-1}$ .

**Table S1.** Area of peaks corresponding to different chemical states in the X-ray photoelectron spectra of the synthesized catalysts.

| Catalyst | $\text{Ni}^{2+}$ | $\text{Ni}^{3+}$ | $\text{Ni}^{0}$ | $\text{Ni}^{+}$ | O1      | O2      | O3      | $\text{Ni}^{2+}$ | $\text{Ni}^{3+}$ | $\text{Ni}^{0}$ | N      |
|----------|------------------|------------------|-----------------|-----------------|---------|---------|---------|------------------|------------------|-----------------|--------|
| HK-NCO   | 15003.5          | 14218.2          | 11226.4         | 33370.5         | 23319.6 | 18842.2 | 24618.5 | 2713.2           | 2255.2           | 438.6           | 1348.1 |
| LK-NCO   | 37949.5          | 26733.4          | 30128.4         | 79380.8         | 47448.7 | 24842.6 | 9111.2  | 3976.4           | 1663.3           | 642.8           | 1975.7 |

**Table S2.** Comparative overpotentials and Tafel slope values of electrocatalysts in this work and other literature.

| Catalyst                                                             | Substrate                                 | $\eta$ (mV) at 10 mA cm <sup>-2</sup> | Tafel slope (mV dec <sup>-1</sup> ) | Electrolyte | Ref       |
|----------------------------------------------------------------------|-------------------------------------------|---------------------------------------|-------------------------------------|-------------|-----------|
| K-doped NiCo <sub>2</sub> O <sub>4</sub> (HK-NCO)                    | Ni foam                                   | 292 (reverse current)                 | 49.9                                | 1 M KOH     | This work |
| Mesoporous NiCo <sub>2</sub> O <sub>4</sub>                          | KIT-6 (mesoporous silica molecular sieve) | 350                                   | 43                                  | 1 M KOH     | 1         |
| P-doped NiCo <sub>2</sub> O <sub>4</sub> Nanowire                    | Ni foam                                   | 300                                   | 120                                 | 1 M KOH     | 2         |
| Ir-doped (10 at%) NiCo <sub>2</sub> O <sub>4</sub> Nanostructure     | Glassy carbon electrode                   | 303                                   | 78                                  | 1 M KOH     | 3         |
| MOF-derived NiCo <sub>2</sub> O <sub>4</sub> /NiO-rGO                | Glassy carbon electrode                   | 340                                   | 66                                  | 1 M KOH     | 4         |
| NiMn LDH nanosheets/NiCo <sub>2</sub> O <sub>4</sub> nanowires       | Ni foam                                   | 310                                   | 99                                  | 1 M KOH     | 5         |
| NiCo <sub>2</sub> O <sub>4</sub> 3-D nanoflowers                     | Graphene nanosheets                       | 383                                   | 137                                 | 1 M KOH     | 6         |
| 3-D core-shell structured NiCo <sub>2</sub> O <sub>4</sub> @CoS      | Ni foam                                   | 290                                   | 92                                  | 1 M KOH     | 7         |
| Hierarchical NiCo <sub>2</sub> O <sub>4</sub> nanosheet-CNTs         | Ni foam                                   | 390                                   | 68.1                                | 1 M KOH     | 8         |
| Co <sub>3</sub> O <sub>4</sub> / NiCo <sub>2</sub> O <sub>4</sub>    | Ni foam                                   | 320                                   | 84                                  | 0.1 M KOH   | 9         |
| Hierarchical NiCo <sub>2</sub> S <sub>4</sub> nanosheets/rGO         | Glassy carbon electrode                   | 366                                   | 65                                  | 1 M KOH     | 10        |
| Ni <sub>0.75</sub> Cu <sub>0.25</sub> Co <sub>2</sub> O <sub>4</sub> | Graphite felt                             | 509                                   | 119                                 | 1 M KOH     | 11        |

MOF (metal organic frameworks), 3-D (Three-dimensional), LDH (layered double hydroxide), CNT (carbon nanotubes), rGO (reduced graphene oxide)

## References

- 1 C. Broicher, F. Zeng, J. Artz, H. Hartmann, A. Besmehn, S. Palkovits and R. Palkovits, *ChemCatChem*, 2019, **11**, 412.
- 2 W. Chu, Z. Shi, Y. Hou, D. Ma, X. Bai, Y. Gao and N. Yang, *ACS Appl. Mater. Interfaces*, 2020, **12**, 2763.
- 3 H.-J. Lee, D.-H. Park, W.-J. Lee, S.-B. Han, M.-H. Kim, J.-H. Byeon and K.-W. Park, *Appl. Catal. A Gen.*, 2021, **626**, 118377.
- 4 Y. Wang, Z. Zhang, X. Liu, F. Ding, P. Zou, X. Wang, Q. Zhao and H. Rao, *ACS Sustain. Chem. Eng.*, 2018, **6**, 12511.
- 5 L. Yang, L. Chen, D. Yang, X. Yu, H. Xue and L. Feng, *J. Power Sources*, 2018, **392**, 23.
- 6 Z. Li, B. Li, J. Chen, Q. Pang and P. Shen, *Int. J. Hydrogen Energy*, 2019, **44**, 16120.
- 7 S. Adhikari, Y. Kwon and D. H. Kim, *Chem. Eng. J.*, 2020, **402**, 126192.
- 8 H. Cheng, Y. Z. Su, P. Y. Kuang, G. F. Chen and Z. Q. Liu, *J. Mater. Chem. A*, 2015, **3**, 19314.
- 9 M. Yang, W. Lu, R. Jin, X. C. Liu, S. Song and Y. Xing, *ACS Sustain. Chem. Eng.*, 2019, **7**, 12214.
- 10 C. Shuai, Z. Mo, X. Niu, X. Yang, G. Liu, J. Wang, N. Liu and R. Guo, *J. Mater. Sci.*, 2020, **55**, 1627.
- 11 H. Park, B. H. Park, J. Choi, S. Kim, T. Kim, Y. S. Youn, N. Son, J. H. Kim and M. Kang, *Nanomaterials*, 2020, **10**, 1.
